# Supplementary material for: Overexpression of phosphatidylinositol 4-kinase type IIIα is associated with undifferentiated status and poor prognosis of human hepatocellular carcinoma
Source: PubMed Central journal article supplement (PMC3898250; doi:10.1186/1471-2407-14-7), 2014-01-06

**A** TP53 mutation status

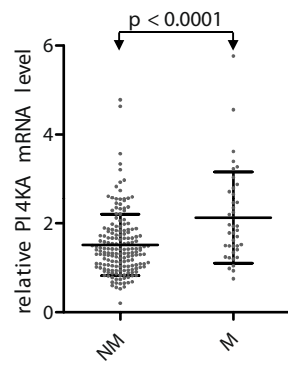

**B** Serum AFP

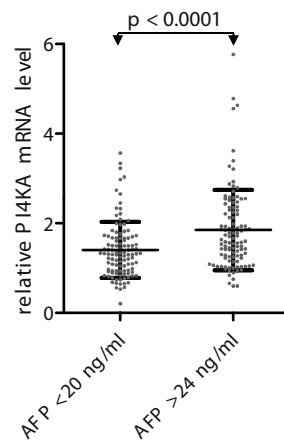

Supplement: 1471-2407-14-7-S4.pdf [file 1471-2407-14-7-S4.pdf]
